# Supplementary material
Source: Springer Nature journal article supplement (https://www.springermedizin.de/resource/supplementary/13722_2012_124_MOESM2_ESM.pdf/9674852)

# SMART-ED Design Overview

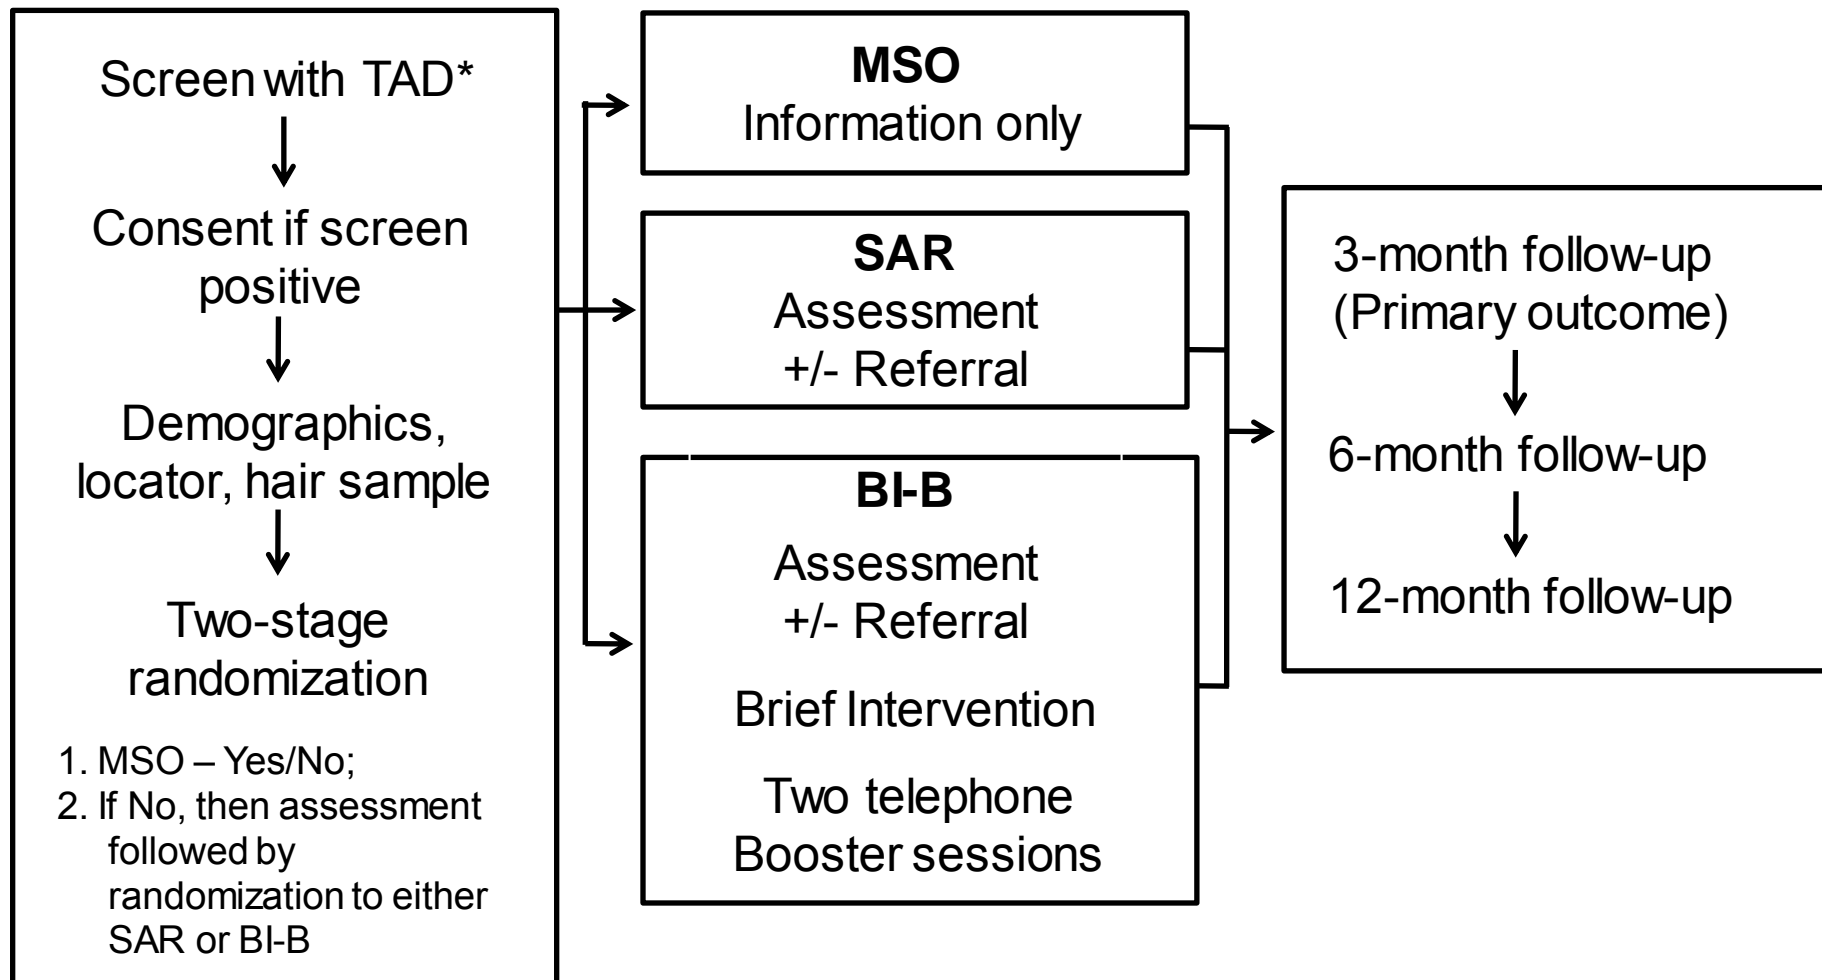

\*Tobacco, Alcohol, and Drug Screening Instrument

Supplement: MOESM2 [file 9674852]
